# Supplementary material
Source: PubMed Central journal article supplement (PMC2869551)
Supplement: jc.2009-2463_2.pdf [file jc.2009-2463_2.pdf]

# Supplemental Figures

## A

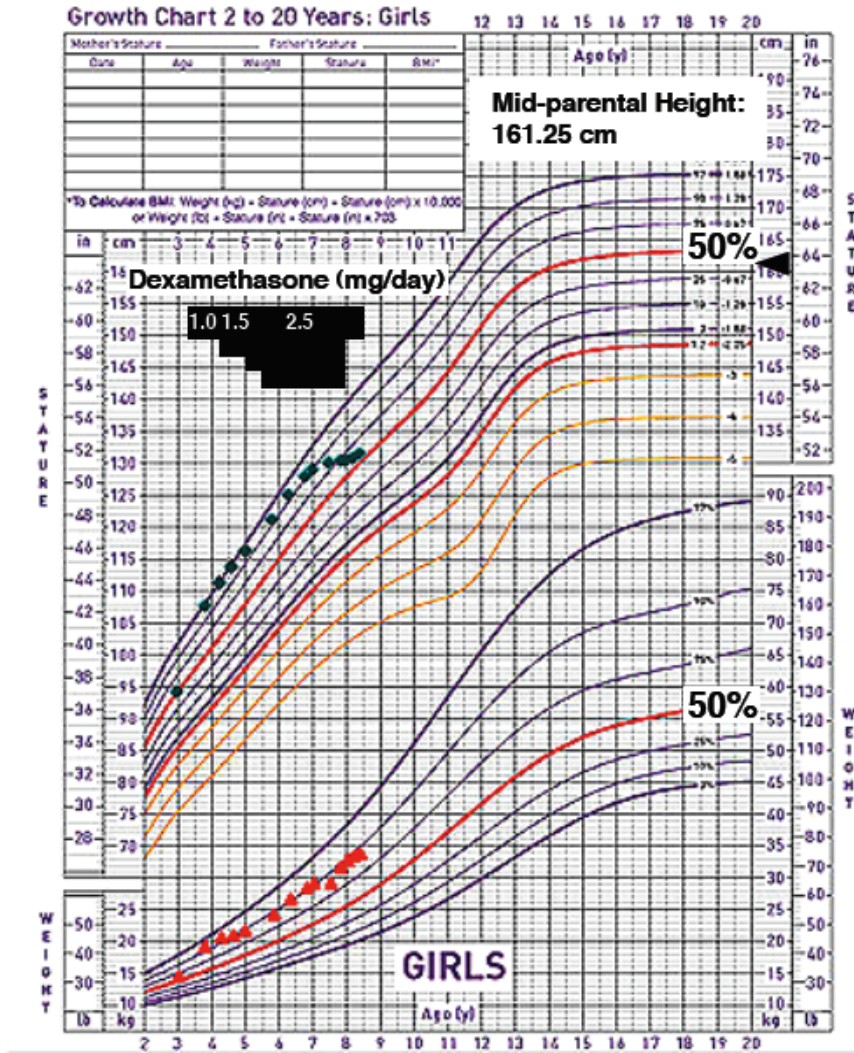

**B**

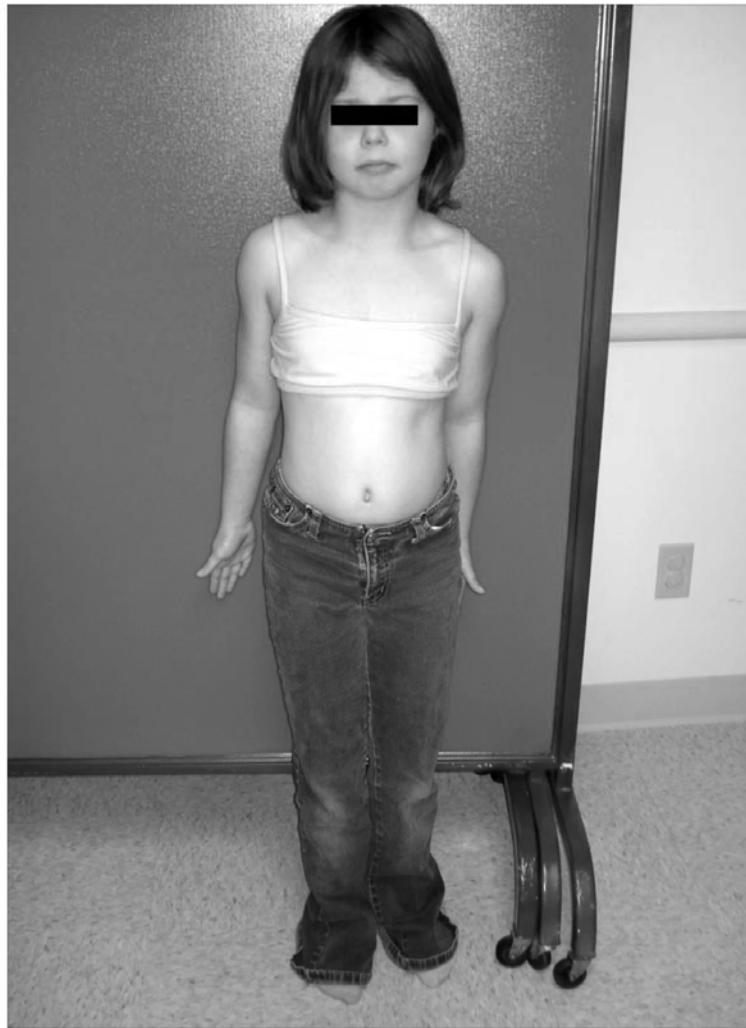

**Supplemental Figure 1:** The patient has been well treated with dexamethasone from age 2 to 8. A: Growth curves of the patient. Growth curves of patient's height and body weight are shown. Period/amounts of the dexamethasone used for the treatment is shown in the top. Red lines indicate 50% percentile of height and body weight. Patient's mid-parental height (161.25 cm) is shown with an arrowhead. B: Photo of the patient at 8 years old.

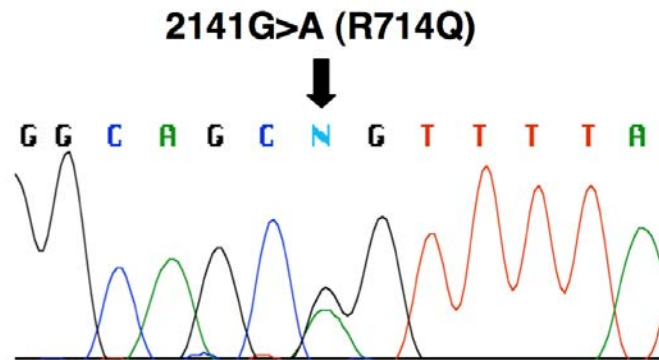

**Supplemental Figure 2:** The patient has a heterozygotic point mutation replacing guanine by adenine at the nucleotide 2141 of the glucocorticoid receptor gene. The mutation causes amino acid replacement from arginine to glutamine at amino acid position 714 of the hGR $\alpha$  protein. (Nucleotide number is counted from translation start site)

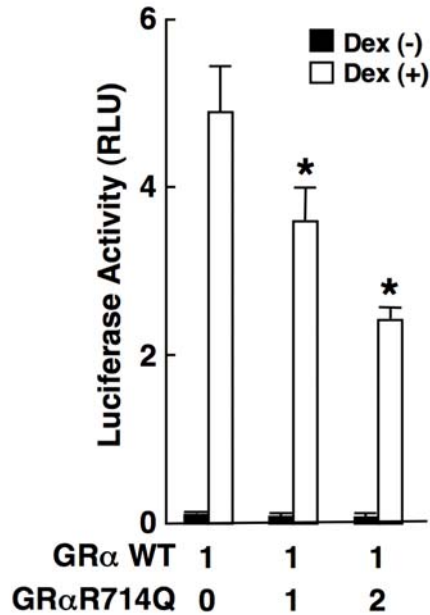

**Supplemental Figure 3:** hGR $\alpha$ R714Q has a dominant negative activity on the wild type GR $\alpha$ -induced transcriptional activity of a glucocorticoid-responsive promoter in HCT116 cells. HCT116 cells were transfected with indicated amounts of the wild type hGR $\alpha$  and/or hGR $\alpha$ R714Q-expressing plasmids together with pMMTV-luc and pGL4.73[*hRluc*/SV40], and were treated with  $10^{-8}$  M of dexamethasone. pRSerbA<sup>-1</sup> was used to keep the same amount of plasmids throughout the experiment. Bars represent mean  $\pm$  S.E. values of the firefly luciferase activity normalized for the renilla luciferase activity in the absence or presence of  $10^{-6}$  M of dexamethasone. The experiment was repeated 3 times and representative data are shown. hGR $\alpha$ R714Q suppressed dexamethasone-stimulated and wild type hGR $\alpha$ -induced transcriptional activity of the MMTV promoter in a dose-dependent fashion, indicating that hGR $\alpha$ R714Q acts as a dominant negative receptor for the wild type GR $\alpha$  on the latter's transactivation of the glucocorticoid-responsive genes.  $p < 0.01$ , compared to the value obtained in the presence of wild type hGR $\alpha$ -expressing plasmid and dexamethasone.

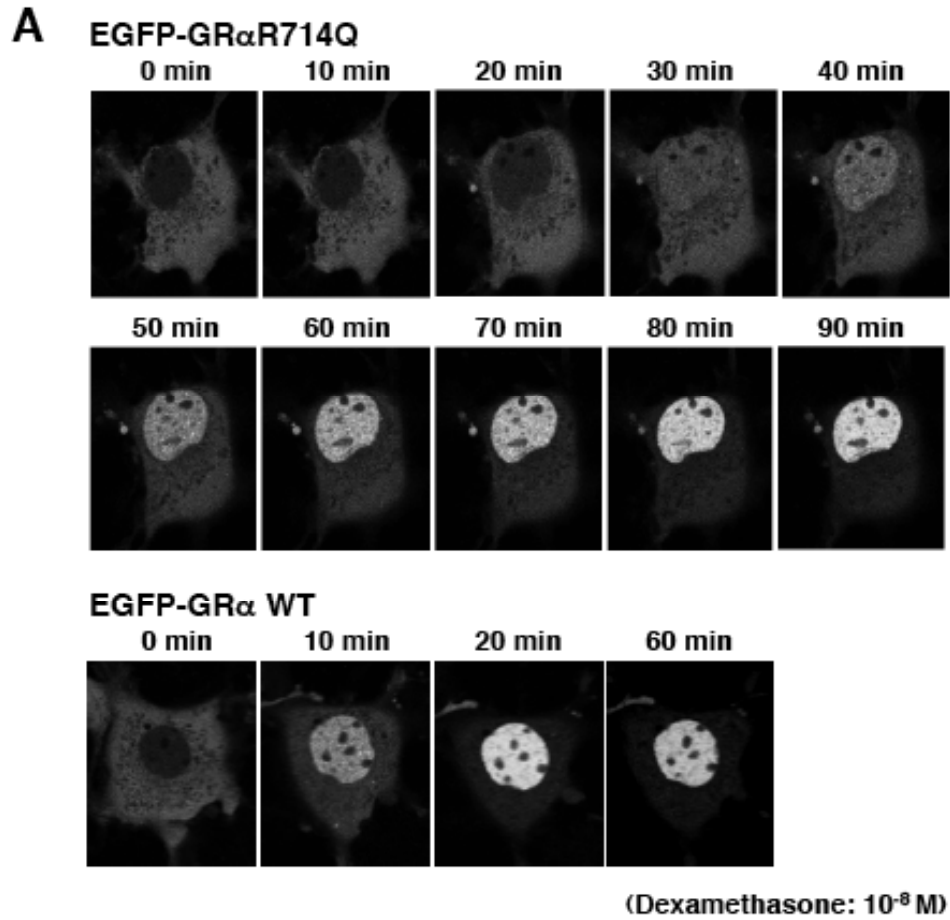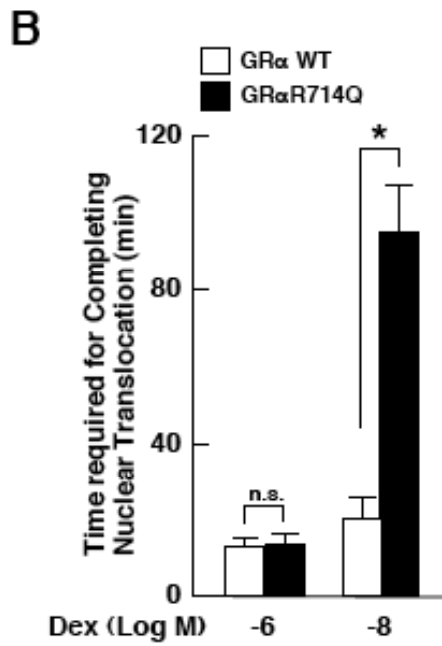

**Figure S4:** hGR $\alpha$ R714Q shows slower nuclear translocation than the wild type GR $\alpha$  in a lower, but not higher concentration of dexamethasone. HCT116 cells were transfected

with plasmids expressing EGFP-fused wild type (WT) hGR $\alpha$  or hGR $\alpha$ R714Q and exposed to the concentrations of dexamethasone indicated. Panel A shows representative images of EGFP-hGR $\alpha$ R714Q (top panels) and EGFP- hGR $\alpha$  WT (bottom panels) subcellular localization before and after the incubation with  $10^{-8}$  M of dexamethasone, while panel B indicates mean  $\pm$  S.E. values of the time required for completing nuclear translocation of EGFP-hGR $\alpha$  WT or -hGR $\alpha$ R714Q in over 20 cells. The results suggest that the molecular machinery for nuclear translocation is intact in hGR $\alpha$ R714Q, while reduced affinity of this mutant receptor to dexamethasone may be responsible for its reduced nuclear translocation at a lower concentration of dexamethasone. n.s.: not significant, \*:  $p < 0.01$ , compared to the conditions indicated.

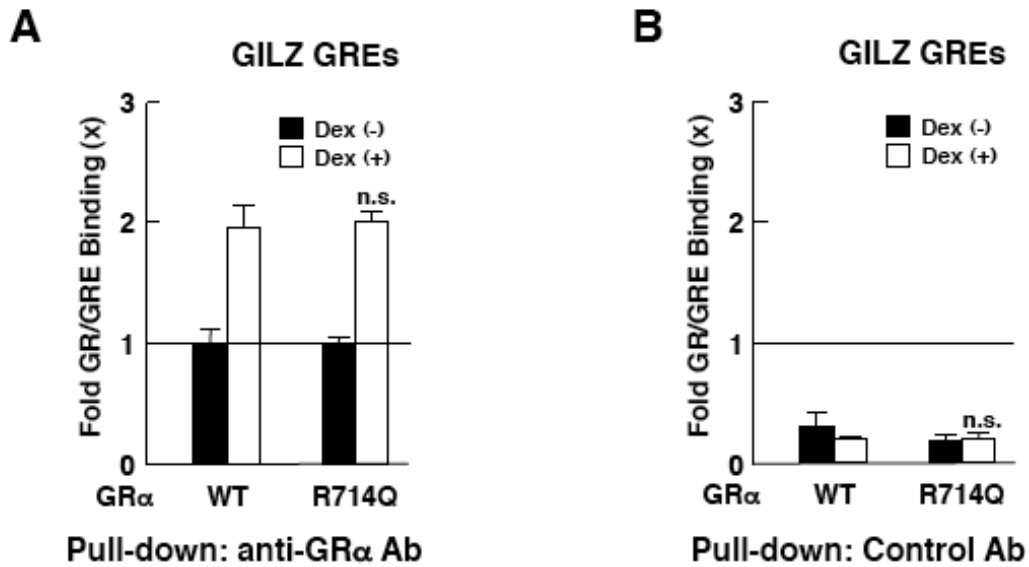

**Supplemental Figure 5:** hGR $\alpha$ R714Q has the GRE-binding activity similar to that of the wild type GR $\alpha$  in a ChIP assay, indicating that the GRE-binding activity of the mutant receptor is preserved. HCT116 cells were transfected with wild type (WT) hGR $\alpha$ - or hGR $\alpha$ R714Q-expressing plasmid and ChIP assays were performed by using anti-hGR $\alpha$  (A) or control (B) antibody. Bars represent mean  $\pm$  S.E. values of fold binding of the receptors to GILZ GREs corrected for input in the absence or presence of  $10^{-8}$  M or  $10^{-6}$  M of dexamethasone. n.s.: not significant, compared to the value obtained in the presence of GR $\alpha$  WT and dexamethasone.

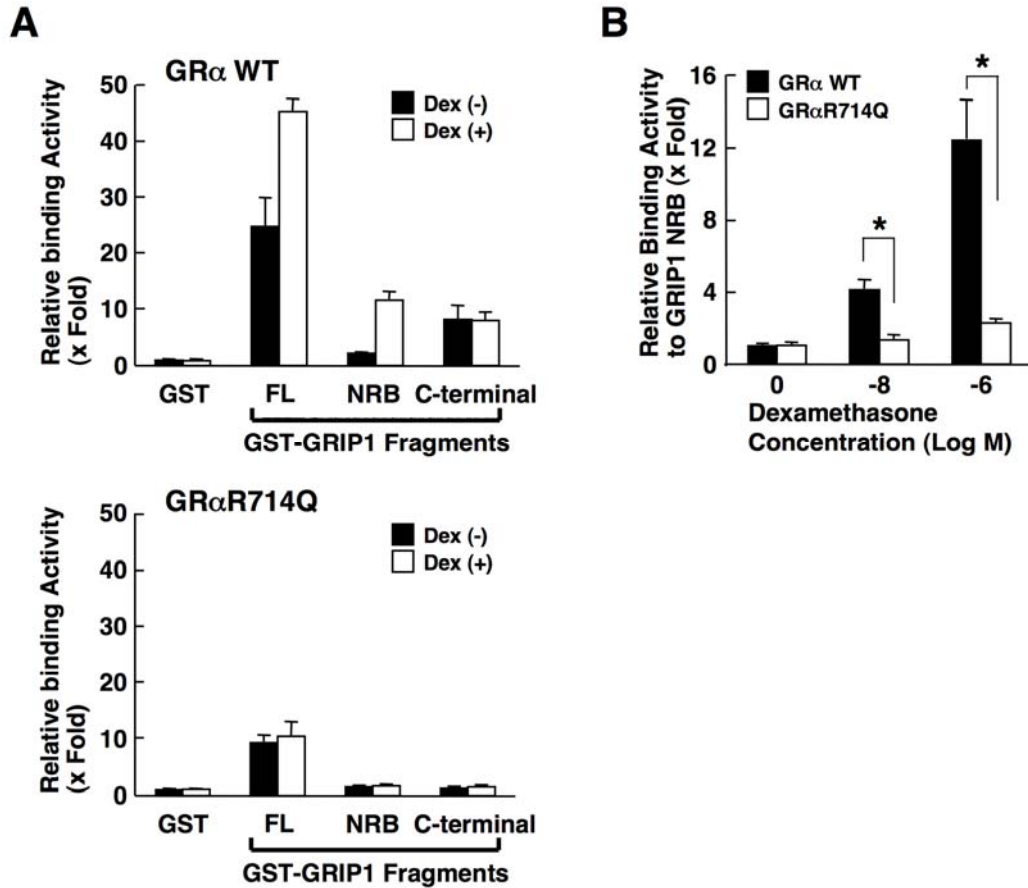

**Supplemental Figure 6: hGRαR714Q has reduced binding activity to GRIP1 *in vitro*.**

**A:** hGRαR714Q has reduced binding activity to various portions of GRIP1 in a GST pull-down assay. Band intensity of <sup>35</sup>S-labeled hGRαs shown in Figure 1C, left panel was recorded and relative binding activity was calculated by correcting with intensity signal of input. Fold binding activity was further calculated by dividing relative binding activity of each point with that of baseline (GST in the absence of dexamethasone). Mean ± S.E. values of relative binding activity obtained from 3 independent experiments are shown. p<0.01, compared to the condition indicated. **B:** hGRαR714Q has reduced binding activity to the NRB domain of GRIP1 in a GST pull-down assay. Band intensity of <sup>35</sup>S-labeled hGRαs shown in Figure 1C, left panel was recorded and relative binding activity was calculated by correcting with intensity signal of input. Fold binding activity was further calculated by dividing relative binding activity of each point with that of baseline (in the absence of dexamethasone of corresponding hGRα protein binding). Mean ± S.E. values of relative binding activity obtained from 3 independent experiments are shown. p<0.01, compared to the condition indicated.



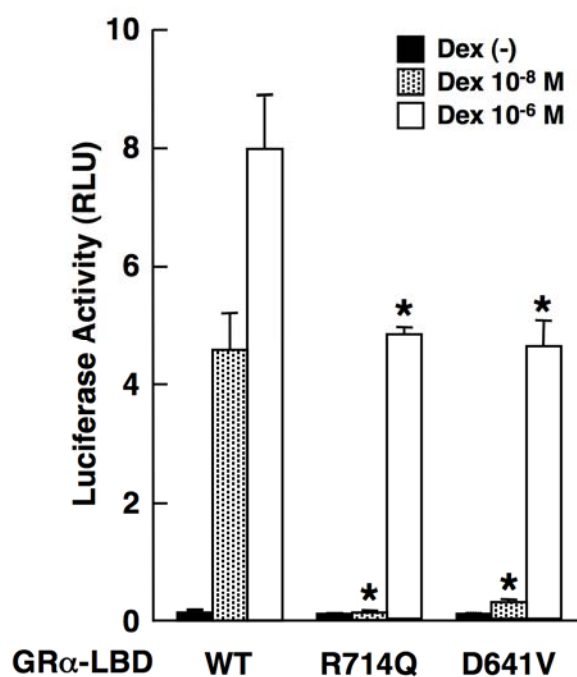

**Supplemental Figure 7:** hGR $\alpha$ R714Q has AF2 with reduced transactivation activity, which is pronounced in a lower concentration of dexamethasone, in HCT116 cells. HCT116 cells were transfected with pM-GR $\alpha$ -LBD, -GR $\alpha$ R714Q-LBD or -GR $\alpha$ D641V-LBD together with pGLA4-E1B-TK-Luc and pGL4.73[*hRluc*/SV40], and were treated with indicated concentrations of dexamethasone. Bars represent mean  $\pm$  S.E. values of the firefly luciferase activity normalized for the renilla luciferase activity in the absence or presence of 10<sup>-8</sup> M or 10<sup>-6</sup> M of dexamethasone. GAL4-DBD-fused hGR $\alpha$ R714Q LBD demonstrated almost no transactivation activity at 10<sup>-8</sup> M of dexamethasone. In contrast, the fusion protein induced much stronger transactivation activity at 10<sup>-6</sup> M of dexamethasone, although it did not reach the level of transactivation exerted by the wild type hGR $\alpha$  LBD. The alteration observed in the transactivation activity of hGR $\alpha$ R714Q LBD was similar to that of the hGR $\alpha$ D641V LBD, a previously reported pathologic GR mutant causing generalized glucocorticoid resistance syndrome (1). These results suggest that AF2 of hGR $\alpha$ R714Q LBD has defective transactivation activity.  $p < 0.01$ , compared to the value obtained in the presence of wild-type GR $\alpha$ -expressing plasmid and the same concentrations of dexamethasone.

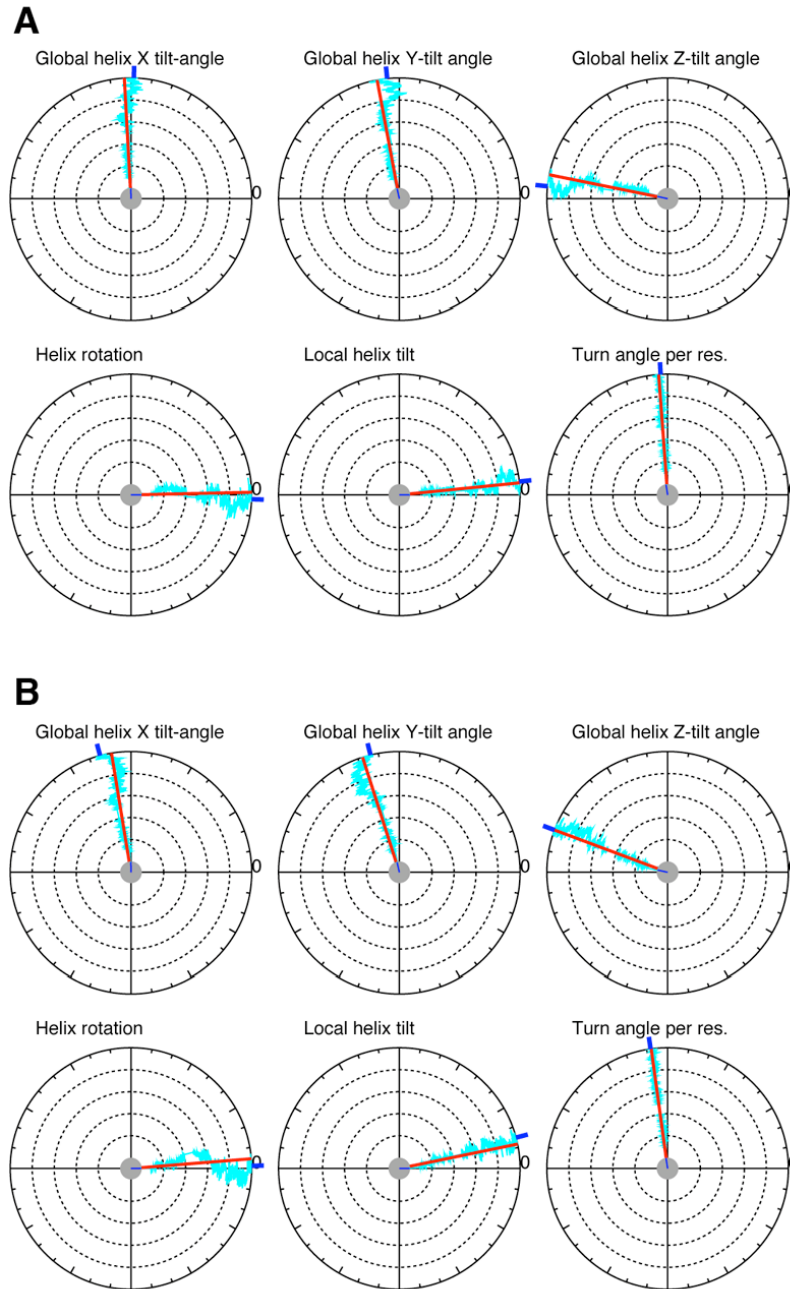

**Supplemental Figure 8:** Position of the helix of the LXXLL coactivator motif shifts more on hGR $\alpha$ R714Q LBD than on hGR $\alpha$  LBD over the course of the simulation. A comparison of the position of the helix of the LXXLL coactivator motif indicates a shift over the course of the simulation from the hGR $\alpha$  LBD (**A**) to the hGR $\alpha$ R714Q LBD (**B**). The light blue trace plots the position of the helix by components of position and other descriptors. The red lines indicate the best linear fit to the data. This shift is significant and suggests a differential binding affinity for the LXXLL motif between the native and the mutant structures.

**A**

|                | 706      | 714 | 726          |
|----------------|----------|-----|--------------|
| Human:         | GNSSQNWQ | R   | FYQLTKLLDSMH |
| Sq. Monkey:    | GNSSQNWQ | R   | FYQLTKLLDSMH |
| Rat:           | GNSSQNWQ | R   | FYQLTKLLDSMH |
| Mouse:         | GNSSQNWQ | R   | FYQLTKLLDSMH |
| X. Laevis:     | GNSSQNWQ | R   | FYQLTKLLDSMH |
| Rainbow Trout: | ENSSQNWQ | R   | FYQLTKLLDSMQ |
| Consensus:     | GNSSQNWQ | R   | FYQLTKLLDSMH |

**B**

|                 | 706      | 714 | 726           |
|-----------------|----------|-----|---------------|
| GR:             | GNSSQNWQ | R   | FYQLTKLLDSMH  |
| MR:             | NNSGQSWQ | R   | FYQLTKLLDSMH  |
| AR:             | KNPTSCS  | R   | FYQLTKLLDSVQ  |
| PR:             | KGVVSSS  | R   | FYQLTKLLDNLH  |
| ER:             | LTLQQQH  | Q   | RLAQLLLILSHIR |
| LXR $\alpha$ :  | PQDQLRF  | P   | RMLMKLVSLRTLS |
| PPAR $\alpha$ : | PDDIFLF  | K   | LLQKMADLRQLV  |
| Consensus:      | N        | F   | QRFYQLTKLLDSL |

**Supplemental Figure 9:** Arginine (R) located at amino acid 714 of the hGR $\alpha$  is preserved in GRs of different species and is shared among human steroid receptors. **A:** Arginine (R) 714 of the hGR $\alpha$  is preserved in the GRs of other species listed. GR amino acid sequences of the squirrel monkey, rat, mouse, xenopus laevis and rainbow trout corresponding to the amino acids from 706 to 726 of the human GR $\alpha$  are assembled. The sequence of the hGR $\alpha$  is shown in the top while the consensus sequence of these species is shown in the bottom. Amino acids mismatching to those of the human GR $\alpha$  are shown in grey boxes. **B:** Arginine (R) 714 of the hGR $\alpha$  is shared with other human steroid receptors and LXR $\alpha$ . Amino acid sequences of the human mineralocorticoid receptor (MR), androgen receptor (AR), progesterone receptor A (PR), estrogen receptor  $\alpha$  (ER), liver X receptor  $\alpha$  (LXR) and peroxisome proliferators-activated receptor  $\alpha$  (PPAR $\alpha$ ) corresponding to the amino acids from 706 to 726 of the hGR $\alpha$  are assembled. The sequence of the hGR $\alpha$  is shown in the top, while the consensus sequence of all receptors is shown in the bottom. Amino acids mismatching to those of the hGR $\alpha$  are shown in grey boxes. Note that PPAR $\alpha$  has lysine (K), which is a basic amino acid similarly to arginine (R), at the position of the preserved arginine residue.
